# Supplementary material for: Occupational exposure to malaria, leishmaniasis and arbovirus vectors in endemic regions: A systematic review
Source: PubMed Central journal article supplement — Curr Res Parasitol Vector Borne Dis. 2024 Jun 1;6:100185. doi: 10.1016/j.crpvbd.2024.100185 (PMC11252614; doi:10.1016/j.crpvbd.2024.100185), 2024-06-01
Supplement: mmc3.pdf [file mmc3.pdf]

**Supplementary Table S3.** Search strategy for information about occupational and outdoor bites of disease vectors conducted from PubMed database [SOM]

---

**Search terms**

---

Malaria [MeSH Terms] OR Dengue[MeSH Terms] OR Leishmaniasis[MeSH Terms] AND occupation[MeSH Terms]

Malaria [MeSH Terms] OR Dengue[MeSH Terms] OR Leishmaniasis[MeSH Terms] AND soldiers[MeSH Terms]

Malaria [MeSH Terms] OR Dengue[MeSH Terms] OR Leishmaniasis[MeSH Terms] AND refugees[MeSH Terms]

Malaria [MeSH Terms] OR Dengue[MeSH Terms] OR Leishmaniasis[MeSH Terms] AND forest[MeSH Terms]

Malaria [MeSH Terms] OR Dengue[MeSH Terms] OR Leishmaniasis[MeSH Terms] AND forestry[MeSH Terms]

Malaria [MeSH Terms] OR Dengue[MeSH Terms] OR Leishmaniasis[MeSH Terms] AND mining[MeSH Terms]

Malaria [MeSH Terms] OR Dengue[MeSH Terms] OR Leishmaniasis[MeSH Terms] AND nurses[MeSH Terms]

Malaria [MeSH Terms] OR Dengue[MeSH Terms] OR Leishmaniasis[MeSH Terms] AND missionaries[MeSH Terms]

Malaria [MeSH Terms] OR Dengue[MeSH Terms] OR Leishmaniasis[MeSH Terms] AND mission[MeSH Terms]

Malaria [MeSH Terms] OR Dengue[MeSH Terms] OR Leishmaniasis[MeSH Terms] AND war[MeSH Terms]

Malaria [MeSH Terms] OR Dengue[MeSH Terms] OR Leishmaniasis[MeSH Terms] AND rubber tapper[MeSH Terms]

Malaria [MeSH Terms] OR Dengue[MeSH Terms] OR Leishmaniasis[MeSH Terms] AND camping[MeSH Terms]

Malaria [MeSH Terms] OR Dengue[MeSH Terms] OR Leishmaniasis[MeSH Terms] AND research[MeSH Terms]

Malaria [MeSH Terms] OR Dengue[MeSH Terms] OR Leishmaniasis[MeSH Terms] AND labourers[MeSH Terms]

Malaria [MeSH Terms] OR Dengue[MeSH Terms] OR Leishmaniasis[MeSH Terms] AND migrant workers[MeSH Terms]

Malaria [MeSH Terms] OR Dengue[MeSH Terms] OR Leishmaniasis[MeSH Terms] AND farmers[MeSH Terms]

Malaria [MeSH Terms] OR Dengue[MeSH Terms] OR Leishmaniasis[MeSH Terms] AND tourists[MeSH Terms]

Malaria [MeSH Terms] OR Dengue[MeSH Terms] OR Leishmaniasis[MeSH Terms] AND travellers[MeSH Terms]

Malaria [MeSH Terms] OR Dengue[MeSH Terms] OR Leishmaniasis[MeSH Terms] AND forest workers[MeSH Terms]

---
