# Supplementary material for: Occupational exposure to malaria, leishmaniasis and arbovirus vectors in endemic regions: A systematic review
Source: PubMed Central journal article supplement — Curr Res Parasitol Vector Borne Dis. 2024 Jun 1;6:100185. doi: 10.1016/j.crpvbd.2024.100185 (PMC11252614; doi:10.1016/j.crpvbd.2024.100185), 2024-06-01
Supplement: mmc4.pdf [file mmc4.pdf]

**Supplementary Table S4.** Article sources, time of search, and numbers of articles obtained and selected

| Source                 | Time of search           | Number of articles |          |
|------------------------|--------------------------|--------------------|----------|
|                        |                          | Obtained           | Selected |
| Cochrane               | 2–11 June 2020           | 425                | 10       |
| Google Scholar         | 24 June–26 Oct. 2020     | 34                 | 7        |
| JSTOR                  | 11 June–11 Nov. 2020     | 16                 | 3        |
| LILACs                 | 8 July–27 Oct. 2020      | 9                  | 1        |
| Medicine Plus          | 13 Nov. 2020–8 July 2021 | 23                 | 3        |
| OpenGrey               | June 2020                | 11                 | 1        |
| Others                 | 5 Nov.–7 Dec. 2020       | 41                 | 6        |
| PubMed                 | 2–13 Nov. 2020           | 541                | 55       |
| WHO Search             | July 2020                | 14                 | 2        |
| Colleagues and experts | 15 Oct.–20 Nov. 2020     | 56                 | 11       |
| Total                  |                          | 1170               | 99       |
